# Supplementary material
Source: PubMed Central journal article supplement (PMC5978550)
Supplement: DS_10.1177_0146621616677715.pdf [file DS_10.1177_0146621616677715.pdf]

## Supplementary Appendix. Latent Gold Syntax for Multidimensional Nominal Model,

### Simulation Illustration 1.

```
model
options
  algorithm
    tolerance=1e-008 emtolerance=0.01 emiterations=250 nriterations=50;
  startvalues
    seed=0 sets=10 tolerance=1e-005 iterations=50;
  bayes
    categorical=1 variances=1 latent=1 poisson=1;
  montecarlo
    seed=0 replicates=500 tolerance=1e-008;
  quadrature nodes=10;
  missing excludeall;
  output
    parameters=effect standarderrors probmeans=posterior profile bivariateresiduals;
variables
  dependent V1 nominal, V2 nominal, V3 nominal, V4 nominal, V5 nominal,
    V6 nominal, V7 nominal, V8 nominal, V9 nominal, V10 nominal, V11 nominal,
    V12 nominal, V13 nominal, V14 nominal, V15 nominal, V16 nominal, V17 nominal,
    V18 nominal, V19 nominal, V20 nominal;
  latent
    CFactor1 continuous,
    CFactor2 continuous,
    Cluster nominal 1;
equations
  (1) CFactor1 ;
  (1) CFactor2 ;
  Cluster <- 1;
  V1 <- 1 + Cluster + (L1) CFactor1 + (L21) CFactor2;
  V2 <- 1 + Cluster + (L2) CFactor1 + (L22) CFactor2;
  V3 <- 1 + Cluster + (L3) CFactor1 + (L23) CFactor2;
  V4 <- 1 + Cluster + (L4) CFactor1 + (L24) CFactor2;
  V5 <- 1 + Cluster + (L5) CFactor1 + (L25) CFactor2;
  V6 <- 1 + Cluster + (L6) CFactor1 + (L26) CFactor2;
  V7 <- 1 + Cluster + (L7) CFactor1 + (L27) CFactor2;
  V8 <- 1 + Cluster + (L8) CFactor1 + (L28) CFactor2;
  V9 <- 1 + Cluster + (L9) CFactor1 + (L29) CFactor2;
  V10 <- 1 + Cluster + (L10) CFactor1 + (L30) CFactor2;
  V11 <- 1 + Cluster + (L11) CFactor1 + (L31) CFactor2;
  V12 <- 1 + Cluster + (L12) CFactor1 + (L32) CFactor2;
  V13 <- 1 + Cluster + (L13) CFactor1 + (L33) CFactor2;
  V14 <- 1 + Cluster + (L14) CFactor1 + (L34) CFactor2;
  V15 <- 1 + Cluster + (L15) CFactor1 + (L35) CFactor2;
  V16 <- 1 + Cluster + (L16) CFactor1 + (L36) CFactor2;
  V17 <- 1 + Cluster + (L17) CFactor1 + (L37) CFactor2;
  V18 <- 1 + Cluster + (L18) CFactor1 + (L38) CFactor2;
  V19 <- 1 + Cluster + (L19) CFactor1 + (L39) CFactor2;
  V20 <- 1 + Cluster + (L20) CFactor1 + (L40) CFactor2;
  L1 = +;
  .
  .
  L40 = +;
end model
```

Supplementary Figure 1. Probability Surface Plots for a Hypothetical Item Generated in Simulation Dataset 1 ( $a_{11}=0$ ,  $a_{21}=1$ ,  $a_{31}=1$ ,  $a_{12}=0$ ,  $a_{22}=0$ ,  $a_{32}=1$ ,  $c_1 = 0$ ,  $c_2 = 1$ ,  $c_3 = .5$ ).

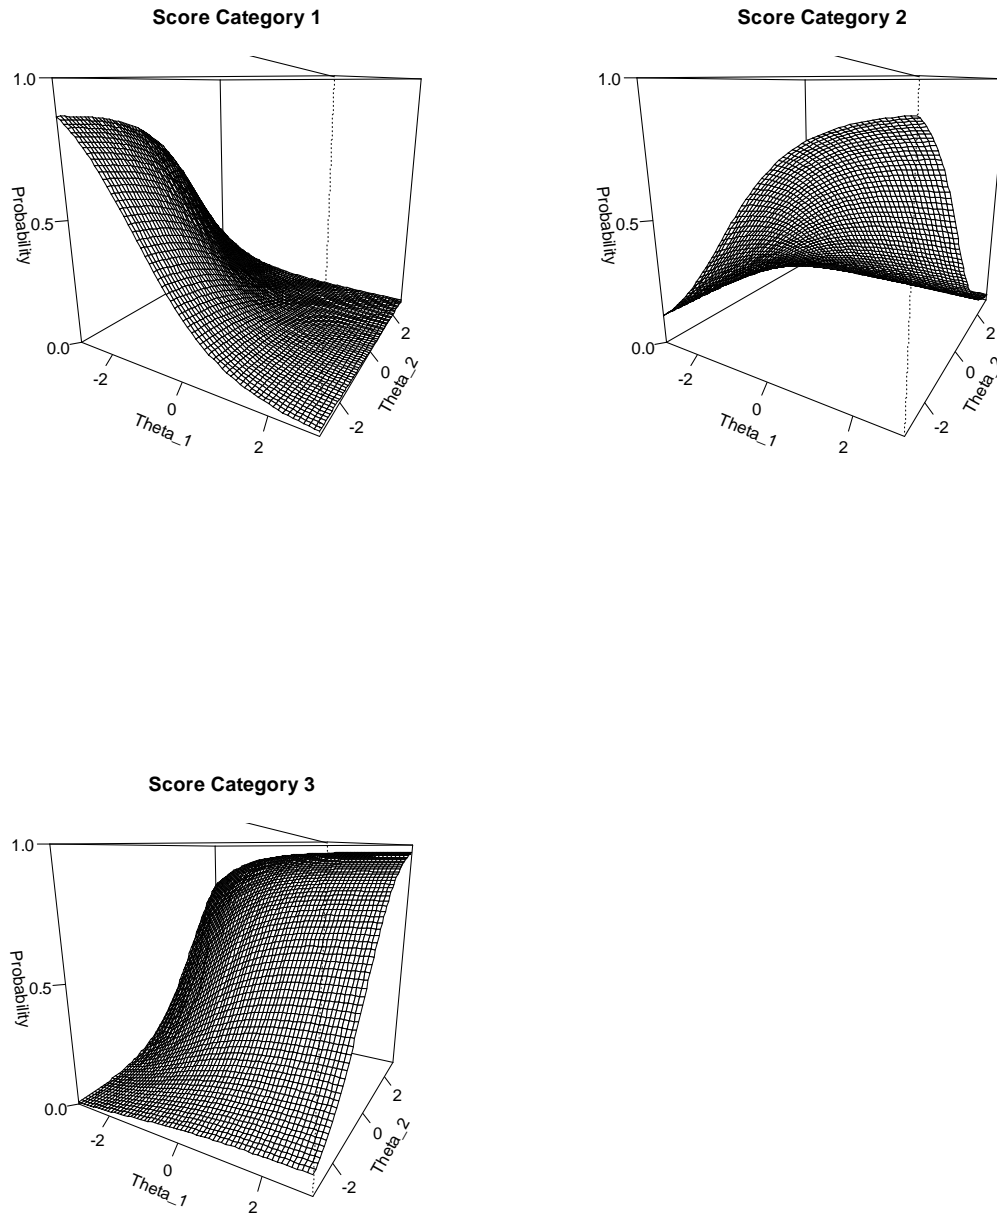

Supplemental Table 1. Simulation Analysis, 2000 Examinees, 20 Items,  
 No. of Item Categories = 3, No. of Dimensions =2, Correlation Between Dimensions=.3

First Five Eigenvalues = 4.933, .988, .913, .910, .876; Factor Loadings = .22-.57

| Model                   | Log-likelihood | Log-prior | Log-posterior | #pars | BIC            | AIC            | AIC3           | CAIC           |
|-------------------------|----------------|-----------|---------------|-------|----------------|----------------|----------------|----------------|
| 1D-Ordinal, Equal item  | -38320.9       | -23.7     | -38344.6      | 41    | 76953.4        | 76723.7        | 76764.7        | 76994.4        |
| 1D-Ordinal              | -38166.4       | -24.0     | -38190.3      | 60    | 76788.8        | 76452.7        | 76512.7        | 76848.8        |
| 2D-Ordinal, Equal Item  | -38320.5       | -25.1     | -38345.6      | 42    | 76960.2        | 76725.0        | 76767.0        | 77002.2        |
| 2D-Ordinal              | -38117.8       | -25.7     | -38143.5      | 80    | 76843.7        | 76395.6        | 76475.6        | 76923.7        |
| 3D-Ordinal, Equal Item  | -38320.5       | -25.6     | -38346.0      | 43    | 76967.8        | 76726.9        | 76769.9        | 77010.8        |
| 3D-Ordinal              | -38025.5       | -35.0     | -38060.5      | 100   | 76811.0        | 76250.9        | 76350.9        | 76911.0        |
| 1D-Nominal, Equal Item* | -37686.3       | -24.2     | -37710.6      | 41    | 75684.3        | 75454.7        | 75495.7        | 75725.3        |
| 1D-Nominal*             | -37533.6       | -24.5     | -37558.1      | 61    | 75530.9        | 75189.3        | 75250.3        | 75591.9        |
| 2D-Nominal, Equal Item* | -36313.8       | -28.1     | -36341.9      | 42    | 72946.9        | 72711.6        | 72753.6        | 72988.9        |
| 2D-Nominal*             | -36080.6       | -28.5     | -36109.1      | 82    | <b>72784.6</b> | <b>72325.3</b> | <b>72407.3</b> | <b>72866.6</b> |
| 3D-Nominal, Equal Item* | -36329.6       | -28.4     | -36357.9      | 43    | 72986.0        | 72745.1        | 72788.1        | 73029.0        |
| 3D-Nominal*             | -36083.6       | -28.9     | -36112.5      | 101   | 72934.8        | 72369.1        | 72470.1        | 73035.8        |

\*With monotonicity constraints applied; **BOLD** identifies best model

Generating item parameters

| Item | s    | c <sub>1</sub> | c <sub>2</sub> |
|------|------|----------------|----------------|
| 1    | 0.89 | -1.24          | -1.19          |
| 2    | 0.89 | -0.86          | 1.15           |
| 3    | 1.21 | 1.94           | 1.93           |
| 4    | 1.48 | 1.29           | 1.36           |
| 5    | 1.48 | 0.66           | -0.05          |
| 6    | 1.34 | 0.87           | 1.92           |
| 7    | 1.37 | -0.31          | 0.75           |
| 8    | 1.11 | -1.10          | 0.30           |
| 9    | 1.38 | -0.25          | -0.80          |
| 10   | 1.47 | -1.06          | 1.38           |
| 11   | 1.34 | 1.80           | 0.66           |
| 12   | 1.34 | -0.37          | 1.34           |
| 13   | 1.36 | 1.63           | 0.97           |
| 14   | 0.88 | -1.01          | -1.79          |
| 15   | 0.94 | -1.54          | -0.22          |
| 16   | 1.06 | 1.71           | 1.70           |
| 17   | 1.39 | -1.43          | 0.06           |
| 18   | 1.15 | -0.48          | -0.69          |
| 19   | 0.81 | 1.79           | 0.90           |
| 20   | 1.36 | 0.33           | 0.10           |

Supplemental Table 2. Simulation Analysis, 2000 Examinees, 20 Items,  
 No. of Item Categories = 3, No. of Dimensions =2, Correlation Between Dimensions=.6

First Five Eigenvalues = 5.064, 1.096, 1.015, .972, .950; Factor Loadings = .31-.50

| Model                   | Log-likelihood | Log-prior | Log-posterior | #pars | BIC            | AIC            | AIC3           | CAIC           |
|-------------------------|----------------|-----------|---------------|-------|----------------|----------------|----------------|----------------|
| 1D-Ordinal, Equal item  | -37467.3       | -22.6     | -37489.9      | 41    | 75246.2        | 75016.5        | 75057.5        | 75287.2        |
| 1D-Ordinal              | -37397.1       | -22.7     | -37419.9      | 60    | 75250.3        | 74914.2        | 74974.2        | 75310.3        |
| 2D-Ordinal, Equal Item  | -37466.8       | -24.1     | -37490.9      | 42    | 75252.8        | 75017.6        | 75059.6        | 75294.8        |
| 2D-Ordinal              | -37370.8       | -24.4     | -37395.2      | 80    | 75349.2        | 74901.6        | 74981.6        | 75429.7        |
| 3D-Ordinal, Equal Item  | -37466.6       | -24.5     | -37491.1      | 43    | 75260.0        | 75019.2        | 75062.2        | 75303.0        |
| 3D-Ordinal              | -37339.7       | -26.0     | -37365.7      | 100   | 75439.5        | 74879.4        | 74979.4        | 75539.5        |
| 1D-Nominal, Equal Item* | -37344.9       | -22.7     | -37367.6      | 41    | 75001.4        | 74771.8        | 74812.8        | 75042.4        |
| 1D-Nominal*             | -37251.3       | -22.8     | -37274.1      | 74    | 75065.0        | 74650.5        | 74724.5        | 75139.0        |
| 2D-Nominal, Equal Item* | -36409.7       | -25.7     | -36435.4      | 42    | <b>73138.6</b> | 72903.4        | 72945.4        | <b>73180.6</b> |
| 2D-Nominal*             | -36295.1       | -25.9     | -36321.0      | 87    | 73251.6        | <b>72764.3</b> | <b>72851.3</b> | 73338.6        |
| 3D-Nominal, Equal Item* | -36411.0       | -26.1     | -36437.2      | 43    | 73148.9        | 72908.0        | 72951.0        | 73191.9        |
| 3D-Nominal*             | -36273.4       | -26.6     | -36300.0      | 109   | 73375.3        | 72764.8        | 72873.8        | 73484.3        |

\*With monotonicity constraints applied; **BOLD** identifies best model

Generating item parameters

| Item | s    | c <sub>1</sub> | c <sub>2</sub> |
|------|------|----------------|----------------|
| 1    | 1.37 | -1.37          | -1.04          |
| 2    | 1.24 | -1.71          | -0.04          |
| 3    | 0.86 | -1.82          | -1.04          |
| 4    | 1.19 | -1.74          | -1.53          |
| 5    | 1.06 | 1.34           | -1.59          |
| 6    | 0.93 | -0.45          | 1.19           |
| 7    | 1.32 | -1.16          | 0.81           |
| 8    | 1.28 | -0.52          | 1.95           |
| 9    | 1.47 | 1.66           | -1.21          |
| 10   | 1.28 | 0.63           | 1.64           |
| 11   | 1.40 | 1.25           | -0.31          |
| 12   | 1.19 | 1.87           | 1.42           |
| 13   | 0.88 | -0.98          | 0.54           |
| 14   | 1.19 | 1.89           | -1.25          |
| 15   | 1.25 | 0.23           | -1.90          |
| 16   | 1.30 | 0.28           | 1.80           |
| 17   | 0.83 | 1.68           | -0.41          |
| 18   | 1.23 | 1.48           | -0.96          |
| 19   | 0.94 | 0.52           | 0.48           |
| 20   | 0.91 | -0.27          | 1.34           |

Supplemental Table 3. Simulation Analysis, 2000 Examinees, 20 Items,  
 No. of Item Categories = 3, No. of Simulated Dimensions =2, Correlation Between Dimensions = 1  
 First Five Eigenvalues = 5.323, 1.022, .984, .957, .943; Factor Loadings = .32-.50

| Model                   | Log-likelihood | Log-prior | Log-posterior | #pars | BIC            | AIC            | AIC3           | CAIC           |
|-------------------------|----------------|-----------|---------------|-------|----------------|----------------|----------------|----------------|
| 1D-Ordinal, Equal item  | -39789.1       | -23.7     | -39812.8      | 41    | 79889.8        | 79660.1        | 79701.1        | 79930.8        |
| 1D-Ordinal              | -39696.0       | -23.9     | -39719.9      | 60    | 79848.0        | 79512.0        | 79572.0        | 79908.0        |
| 2D-Ordinal, Equal Item  | -39789.1       | -25.2     | -39814.2      | 42    | 79897.4        | 79662.1        | 79704.1        | 79939.4        |
| 2D-Ordinal              | -39678.8       | -25.5     | -39704.3      | 80    | 79965.7        | 79517.6        | 79597.6        | 80045.7        |
| 3D-Ordinal, Equal Item  | -39789.4       | -25.6     | -39815.0      | 43    | 79905.7        | 79664.8        | 79707.8        | 79948.7        |
| 3D-Ordinal              | -39647.6       | -30.0     | -39677.6      | 100   | 80055.2        | 79495.1        | 79595.1        | 80155.2        |
| 1D-Nominal, Equal Item* | -39043.7       | -24.3     | -39067.0      | 41    | <b>78398.9</b> | 78169.3        | 78210.3        | <b>78439.9</b> |
| 1D-Nominal*             | -38962.3       | -24.4     | -38986.8      | 68    | 78441.5        | <b>78060.7</b> | <b>78128.7</b> | 78509.5        |
| 2D-Nominal, Equal Item* | -39040.6       | -25.8     | -39066.4      | 42    | 78400.4        | 78165.2        | 78207.2        | 78442.4        |
| 2D-Nominal*             | -38936.6       | -26.1     | -38962.8      | 95    | 78595.4        | 78603.3        | 78158.3        | 78690.4        |
| 3D-Nominal, Equal Item* | -39040.6       | -26.3     | -39066.8      | 43    | 78407.9        | 78167.1        | 78210.1        | 78450.9        |
| 3D-Nominal*             | -38915.1       | -26.7     | -38941.9      | 118   | 78727.2        | 78066.3        | 78184.3        | 78845.2        |

\*With monotonicity constraints applied; **BOLD** identifies best model

Generating item parameters

| Item | s    | c <sub>1</sub> | c <sub>2</sub> |
|------|------|----------------|----------------|
| 1    | 1.20 | -1.56          | 1.92           |
| 2    | 0.90 | -1.67          | -1.42          |
| 3    | 1.40 | 1.91           | 0.42           |
| 4    | 1.21 | -0.12          | -0.70          |
| 5    | 1.02 | -0.96          | 1.16           |
| 6    | 1.21 | 1.72           | 0.29           |
| 7    | 1.24 | 0.26           | -0.04          |
| 8    | 1.26 | 0.46           | -0.41          |
| 9    | 1.39 | -0.34          | 1.30           |
| 10   | 0.86 | -0.22          | 0.77           |
| 11   | 1.28 | -1.47          | -1.44          |
| 12   | 1.08 | -1.62          | 0.77           |
| 13   | 1.41 | 0.25           | -0.37          |
| 14   | 1.17 | -0.10          | 0.18           |
| 15   | 1.17 | -0.54          | 0.44           |
| 16   | 1.34 | -1.39          | 0.22           |
| 17   | 1.42 | -0.51          | -0.91          |
| 18   | 1.11 | -1.05          | 1.68           |
| 19   | 1.01 | -1.37          | -0.71          |
| 20   | 1.19 | -0.38          | 1.61           |

Supplemental Table 4. Simulation Analysis, 2000 Examinees, 20 Items,  
No. of Item Categories = 4, No. of Dimensions =2, Correlation Between Dimensions=.3

First Five Eigenvalues = 7.412, 1.039, .870, .794, .771; Factor Loadings = .43-.67

| Model                   | Log-likelihood | Log-prior | Log-posterior | #pars | BIC            | AIC            | AIC3           | CAIC           |
|-------------------------|----------------|-----------|---------------|-------|----------------|----------------|----------------|----------------|
| 1D-Ordinal, Equal item  | -38016.6       | -32.2     | -38048.8      | 61    | 76496.8        | 76155.1        | 76216.1        | 76557.8        |
| 1D-Ordinal              | -37890.0       | -32.5     | -37922.5      | 80    | 76388.2        | 75940.1        | 76020.1        | 76468.2        |
| 2D-Ordinal, Equal Item  | -37855.1       | -36.1     | -37891.2      | 62    | 76181.5        | 75834.3        | 75896.3        | 76243.5        |
| 2D-Ordinal              | -37698.1       | -37.0     | -37735.1      | 100   | 76156.3        | 75596.2        | 75696.2        | 76256.3        |
| 3D-Ordinal, Equal Item  | -37854.0       | -36.5     | -37890.5      | 63    | 76186.8        | 75834.0        | 75897.0        | 76249.8        |
| 3D-Ordinal              | -37685.6       | -37.6     | -37723.2      | 120   | 76283.3        | 75611.2        | 75731.2        | 76403.3        |
| 1D-Nominal, Equal Item* | -37976.2       | -32.3     | -38008.5      | 63    | 76431.2        | 76078.4        | 76141.4        | 76494.2        |
| 1D-Nominal*             | -37831.3       | -32.6     | -37863.9      | 120   | 76574.7        | 75902.6        | 76022.6        | 76694.7        |
| 2D-Nominal, Equal Item* | -37594.0       | -36.9     | -37630.9      | 66    | <b>75689.6</b> | 75320.0        | 75386.0        | <b>75756.6</b> |
| 2D-Nominal*             | -37418.4       | -37.5     | -37455.9      | 173   | 76151.8        | <b>75182.8</b> | <b>75355.8</b> | 76324.8        |
| 3D-Nominal, Equal Item* | -37589.7       | -37.2     | -37626.9      | 69    | 75703.9        | 75317.4        | 75386.4        | 75772.9        |
| 3D-Nominal*             | -37367.8       | -38.3     | -37406.1      | 233   | 76506.6        | 75201.6        | 75434.6        | 76739.6        |

\*With monotonicity constraints applied; **BOLD** identifies best model

Generating item parameters

| Item | $s_1$ | $c_1$ | $c_2$ | $c_3$ |
|------|-------|-------|-------|-------|
| 1    | 1.25  | 0.88  | 1.66  | 0.29  |
| 2    | 1.04  | 1.87  | 1.56  | -1.17 |
| 3    | 0.88  | -1.86 | -1.48 | -0.99 |
| 4    | 1.18  | -0.69 | -1.12 | 1.56  |
| 5    | 0.94  | -0.28 | -0.64 | -0.09 |
| 6    | 1.12  | -0.97 | -0.30 | 1.35  |
| 7    | 1.36  | 1.44  | 1.06  | 1.11  |
| 8    | 0.88  | 1.61  | -1.46 | -1.97 |
| 9    | 1.38  | 0.63  | -1.03 | 1.88  |
| 10   | 0.82  | -1.27 | 0.18  | 1.31  |
| 11   | 0.85  | -1.13 | -1.73 | 1.71  |
| 12   | 1.43  | -1.13 | 1.43  | 1.41  |
| 13   | 1.06  | -0.24 | -1.91 | -1.66 |
| 14   | 1.13  | 1.39  | -1.86 | 0.36  |
| 15   | 1.08  | 1.85  | 1.82  | 1.78  |
| 16   | 1.09  | 0.82  | -0.76 | -1.11 |
| 17   | 1.48  | 0.37  | 1.14  | -1.36 |
| 18   | 1.43  | 1.17  | 0.26  | -1.02 |
| 19   | 1.12  | 1.07  | -0.49 | -1.97 |
| 20   | 1.34  | -1.23 | -1.34 | -0.45 |

Supplemental Table 5. Simulation Analysis, 2000 Examinees, 20 Items,

No. of Item Categories = 4, No. of Dimensions =2, Correlation Between Dimensions=.6

First Five Eigenvalues = 9.018, 1.083, .658, .611, .605; Factor Loadings = .55-.75

| Model                   | Log-likelihood | Log-prior | Log-posterior | #pars | BIC            | AIC            | AIC3           | CAIC           |
|-------------------------|----------------|-----------|---------------|-------|----------------|----------------|----------------|----------------|
| 1D-Ordinal, Equal item  | -38247.8       | -33.7     | -38281.5      | 61    | 76959.3        | 76617.6        | 76678.6        | 77020.3        |
| 1D-Ordinal              | -38176.5       | -33.9     | -38210.4      | 80    | 76961.0        | 76513.0        | 76593.0        | 77041.1        |
| 2D-Ordinal, Equal Item  | -38074.6       | -38.1     | -38112.7      | 62    | 76620.5        | 76273.2        | 76335.2        | 76682.5        |
| 2D-Ordinal              | -37954.7       | -39.0     | -37993.6      | 100   | 76669.4        | 76109.4        | 76209.4        | 76769.4        |
| 3D-Ordinal, Equal Item  | -38075.9       | -38.4     | -38114.3      | 63    | 76630.6        | 76277.7        | 76340.7        | 76693.6        |
| 3D-Ordinal              | -37936.4       | -40.0     | -37976.3      | 120   | 76784.8        | 76112.7        | 76232.7        | 76904.8        |
| 1D-Nominal, Equal Item* | -38215.6       | -33.8     | -38249.4      | 63    | 76910.1        | 76557.2        | 76620.2        | 76973.1        |
| 1D-Nominal*             | -38115.5       | -34.1     | -38149.6      | 120   | 77143.2        | 76471.1        | 76591.1        | 77263.2        |
| 2D-Nominal, Equal Item* | -37772.9       | -38.7     | -37811.6      | 66    | <b>76047.5</b> | 75677.9        | <b>75743.9</b> | <b>76113.5</b> |
| 2D-Nominal*             | -37637.8       | -39.2     | -37677.0      | 176   | 76613.3        | 75627.6        | 75803.6        | 76789.3        |
| 3D-Nominal, Equal Item* | -37768.5       | -39.1     | -37807.7      | 69    | 76061.5        | 75675.0        | 75744.0        | 76130.5        |
| 3D-Nominal*             | -37578.5       | -40.3     | -37618.9      | 232   | 76920.5        | <b>75621.1</b> | 75853.1        | 77152.5        |

\*With monotonicity constraints applied; **BOLD** identifies best model

Generating item parameters

| Item | $s_1$ | $c_1$ | $c_2$ | $c_3$ |
|------|-------|-------|-------|-------|
| 1    | 1.36  | 2.00  | 1.52  | 0.27  |
| 2    | 1.07  | -1.82 | -1.60 | -0.32 |
| 3    | 1.18  | -0.57 | 1.24  | -0.97 |
| 4    | 0.82  | 1.85  | -1.06 | 1.80  |
| 5    | 1.33  | 0.56  | 1.99  | -0.01 |
| 6    | 1.23  | -1.66 | 0.93  | -0.63 |
| 7    | 1.43  | -1.98 | 0.14  | -1.17 |
| 8    | 1.29  | 0.13  | 1.58  | 0.79  |
| 9    | 1.09  | 0.90  | 1.21  | -0.35 |
| 10   | 0.99  | 0.37  | 0.81  | -1.75 |
| 11   | 1.10  | 1.43  | 0.87  | 0.73  |
| 12   | 1.13  | 0.35  | 1.49  | -0.93 |
| 13   | 1.29  | 1.76  | 1.06  | 0.48  |
| 14   | 1.30  | -1.66 | -1.57 | -0.48 |
| 15   | 0.93  | 1.28  | -0.01 | -0.44 |
| 16   | 1.31  | -1.03 | 1.84  | 1.98  |
| 17   | 1.15  | 0.50  | 0.35  | -1.95 |
| 18   | 1.28  | 0.27  | -0.95 | -0.78 |
| 19   | 1.19  | -0.43 | 1.27  | 1.28  |
| 20   | 1.45  | 1.35  | -1.94 | 1.57  |

Supplemental Table 6. Simulation Analysis, 2000 Examinees, 20 Items,

No. of Item Categories = 4, No. of Dimensions =1

First Five Eigenvalues = 9.450, .972, .638, .628, .576; Factor Loadings = .58-.80

| Model                   | Log-likelihood | Log-prior | Log-posterior | #pars | BIC            | AIC            | AIC3           | CAIC           |
|-------------------------|----------------|-----------|---------------|-------|----------------|----------------|----------------|----------------|
| 1D-Ordinal, Equal item  | -43847.1       | -27.2     | -43874.4      | 61    | <b>88157.9</b> | 87816.2        | 87877.2        | <b>88218.9</b> |
| 1D-Ordinal              | -43776.3       | -27.4     | -43803.7      | 80    | 88160.7        | <b>87712.6</b> | <b>87792.6</b> | 88240.7        |
| 2D-Ordinal, Equal Item  | -43844.1       | -28.7     | -43872.8      | 62    | 88159.4        | 87812.1        | 87874.1        | 88221.4        |
| 2D-Ordinal              | -43757.3       | -29.1     | -43786.4      | 100   | 88274.7        | 87714.6        | 87814.6        | 88374.7        |
| 3D-Ordinal, Equal Item  | -43843.9       | -29.2     | -43873.1      | 63    | 88166.6        | 87813.7        | 87876.7        | 88229.6        |
| 3D-Ordinal              | -43745.9       | -30.1     | -43775.9      | 120   | 88403.9        | 87731.8        | 87851.8        | 88523.9        |
| 1D-Nominal, Equal Item* | -43846.7       | -27.2     | -43873.9      | 63    | 88172.2        | 87819.3        | 87882.3        | 88235.2        |
| 1D-Nominal*             | -43752.2       | -27.4     | -43779.6      | 120   | 88416.6        | 87744.5        | 87864.5        | 88536.6        |
| 2D-Nominal, Equal Item* | -43843.3       | -28.8     | -43872.0      | 66    | 88188.2        | 87818.5        | 87884.5        | 88254.2        |
| 2D-Nominal*             | -43706.4       | -29.1     | -43735.5      | 168   | 88689.8        | 87748.8        | 87916.8        | 88857.8        |
| 3D-Nominal, Equal Item* | -43842.7       | -29.2     | -43871.9      | 69    | 88209.9        | 87823.5        | 87892.5        | 88278.9        |
| 3D-Nominal*             | -43668.8       | -29.8     | -43698.6      | 216   | 88979.5        | 87769.7        | 87985.7        | 89195.5        |

\*With monotonicity constraints applied; **BOLD** identifies best model

Generating item parameters

| Item | s <sub>1</sub> | c <sub>1</sub> | c <sub>2</sub> | c <sub>3</sub> |
|------|----------------|----------------|----------------|----------------|
| 1    | 1.03           | -1.24          | 1.46           | -0.78          |
| 2    | 1.23           | -1.14          | -0.32          | -0.01          |
| 3    | 1.03           | 0.42           | 0.63           | -0.26          |
| 4    | 1.35           | 0.10           | -1.94          | -1.08          |
| 5    | 1.28           | -1.64          | -0.57          | 1.39           |
| 6    | 0.92           | 1.41           | 0.03           | -0.10          |
| 7    | 1.09           | 0.48           | 0.17           | -0.96          |
| 8    | 0.98           | 0.32           | 0.01           | -0.32          |
| 9    | 0.91           | 1.43           | 0.95           | -0.87          |
| 10   | 0.87           | 0.97           | 1.32           | 0.31           |
| 11   | 0.88           | -1.10          | -1.42          | -1.93          |
| 12   | 1.16           | 1.82           | 0.20           | 0.87           |
| 13   | 0.83           | -0.45          | 0.02           | 1.52           |
| 14   | 1.12           | -1.24          | -1.72          | 1.44           |
| 15   | 0.97           | 1.45           | 1.57           | 1.11           |
| 16   | 1.04           | -1.39          | 0.52           | -0.08          |
| 17   | 1.02           | 0.84           | -1.49          | -0.89          |
| 18   | 1.31           | -0.59          | -1.97          | 1.48           |
| 19   | 1.49           | 1.97           | -0.78          | -1.50          |
| 20   | 1.19           | 0.87           | -0.35          | 1.56           |



Supplemental Table 7. Simulation Analysis, 2000 Examinees, 20 Items,  
No. of Item Categories = 4, No. of Dimensions =3, Correlation Between Dimensions=.3

First Five Eigenvalues = 6.934, 1.056, .868, .813, .783; Factor Loadings = .34-.66

| Model                   | Log-likelihood | Log-prior | Log-posterior | #pars | BIC            | AIC            | AIC3           | CAIC           |
|-------------------------|----------------|-----------|---------------|-------|----------------|----------------|----------------|----------------|
| 1D-Ordinal, Equal item  | -42404.1       | -30.2     | -42434.3      | 61    | 85271.9        | 84930.2        | 84991.2        | 85332.9        |
| 1D-Ordinal              | -42294.0       | -30.5     | -42324.5      | 80    | 85196.1        | 84748.0        | 84828.0        | 85276.1        |
| 2D-Ordinal, Equal Item  | -42371.1       | -32.3     | -42403.4      | 62    | 85213.5        | 84866.2        | 84928.2        | 85275.5        |
| 2D-Ordinal              | -42226.6       | -32.9     | -42259.5      | 100   | 85213.3        | 84653.2        | 84753.2        | 85313.3        |
| 3D-Ordinal, Equal Item  | -42372.5       | -32.7     | -42405.1      | 63    | 85223.8        | 84870.9        | 84933.9        | 85286.8        |
| 3D-Ordinal              | -42202.6       | -34.2     | -42236.7      | 120   | 85317.2        | 84645.1        | 84765.1        | 85437.2        |
| 1D-Nominal, Equal Item* | -42399.2       | -30.2     | -42429.4      | 63    | 85277.2        | 84924.4        | 84987.4        | 85340.2        |
| 1D-Nominal*             | -42274.8       | -30.5     | -42305.3      | 120   | 85461.6        | 84789.5        | 84909.5        | 85581.6        |
| 2D-Nominal, Equal Item* | -41738.8       | -33.1     | -41771.9      | 65    | 83971.6        | 83607.6        | 83672.6        | 84036.6        |
| 2D-Nominal*             | -41583.7       | -33.5     | -41617.2      | 169   | 84452.0        | 83505.5        | 83674.5        | 84621.0        |
| 3D-Nominal, Equal Item* | -41503.5       | -33.8     | -41537.3      | 67    | <b>83516.2</b> | 83140.9        | <b>83207.9</b> | <b>83583.2</b> |
| 3D-Nominal*             | -41307.3       | -34.3     | -41341.6      | 220   | 84286.7        | <b>83054.5</b> | 83274.5        | 84506.7        |

\*With monotonicity constraints applied; **BOLD** identifies best model

Generating item parameters

| Item | $s_1$ | $c_1$ | $c_2$ | $c_3$ |
|------|-------|-------|-------|-------|
| 1    | 1.05  | -1.85 | -1.70 | 0.30  |
| 2    | 1.29  | 1.41  | 1.86  | 1.89  |
| 3    | .99   | 1.86  | -1.79 | -1.30 |
| 4    | .88   | 0.14  | -0.94 | -0.88 |
| 5    | 1.24  | -0.31 | 1.66  | 1.49  |
| 6    | 1.10  | 0.38  | 1.64  | -1.69 |
| 7    | .95   | -0.49 | 1.53  | -1.09 |
| 8    | 1.40  | -0.89 | 1.38  | -0.83 |
| 9    | 1.15  | -1.58 | -1.59 | -1.60 |
| 10   | 1.43  | 1.56  | 0.71  | -0.30 |
| 11   | 1.01  | -0.35 | 1.71  | -0.76 |
| 12   | 1.32  | 0.91  | 0.18  | 1.77  |
| 13   | 1.41  | 1.22  | 0.74  | -1.63 |
| 14   | 1.19  | 0.18  | 1.52  | -1.25 |
| 15   | 1.42  | 1.30  | -1.50 | 0.51  |
| 16   | 1.45  | -0.08 | -0.92 | -1.92 |
| 17   | 1.32  | 1.67  | -1.84 | -0.17 |
| 18   | .95   | 0.08  | -1.84 | 0.66  |
| 19   | 1.44  | -0.03 | -1.48 | -0.36 |
| 20   | .99   | -1.57 | 0.62  | 1.49  |

Supplemental Table 8. Simulation Analysis, 2000 Examinees, 20 Items,  
No. of Item Categories = 4, No. of Dimensions =3, Correlation Between Dimensions=.6

First Five Eigenvalues = 8.459, 1.072, .766, .760, .722; Factor Loadings = .49-.73

| Model                   | Log-likelihood | Log-prior | Log-posterior | #pars | BIC            | AIC            | AIC3           | CAIC           |
|-------------------------|----------------|-----------|---------------|-------|----------------|----------------|----------------|----------------|
| 1D-Ordinal, Equal item  | -40254.5       | -31.5     | -40286.1      | 61    | 80972.7        | 80631.1        | 80692.1        | 81033.7        |
| 1D-Ordinal              | -40115.0       | -31.8     | -40146.8      | 80    | 80838.0        | 80390.0        | 80470.0        | 80918.0        |
| 2D-Ordinal, Equal Item  | -40165.8       | -34.5     | -40200.4      | 62    | 80802.9        | 80455.7        | 80517.7        | 80864.9        |
| 2D-Ordinal              | -39972.4       | -35.7     | -40008.1      | 100   | 80705.0        | 80144.9        | 80244.9        | 80805.0        |
| 3D-Ordinal, Equal Item  | -40166.7       | -35.0     | -40201.7      | 63    | 80812.2        | 80459.4        | 80522.4        | 80875.2        |
| 3D-Ordinal              | -39954.0       | -36.4     | -39990.4      | 120   | 80820.1        | 80148.0        | 80268.0        | 80940.1        |
| 1D-Nominal, Equal Item* | -40250.4       | -31.5     | -40282.0      | 63    | 80979.7        | 80626.8        | 80689.8        | 81042.7        |
| 1D-Nominal*             | -40086.3       | -31.9     | -40118.1      | 120   | 81084.7        | 80412.6        | 80532.6        | 81204.7        |
| 2D-Nominal, Equal Item* | -39872.9       | -34.9     | -39907.8      | 66    | 80247.5        | 79877.8        | 79943.8        | 80313.5        |
| 2D-Nominal*             | -39643.9       | -35.9     | -39679.8      | 178   | 80640.7        | 79643.8        | 79821.8        | 80818.7        |
| 3D-Nominal, Equal Item* | -39776.2       | -35.5     | -39811.7      | 68    | <b>80069.2</b> | 79688.3        | 79756.3        | <b>80137.2</b> |
| 3D-Nominal*             | -39513.9       | -36.6     | -39550.5      | 225   | 80738.0        | <b>79477.8</b> | <b>79702.8</b> | 80963.0        |

\*With monotonicity constraints applied; **BOLD** identifies best model

Generating item parameters

| Item | $s_1$ | $c_1$ | $c_2$ | $c_3$ |
|------|-------|-------|-------|-------|
| 1    | 1.25  | -1.64 | 0.82  | 1.01  |
| 2    | 1.04  | -0.29 | -0.13 | 0.14  |
| 3    | 0.88  | 0.87  | 0.72  | 0.52  |
| 4    | 1.18  | 0.32  | 0.71  | 0.32  |
| 5    | 0.94  | -1.52 | -0.81 | 0.81  |
| 6    | 1.12  | -0.91 | -1.59 | 0.32  |
| 7    | 1.36  | -0.37 | -1.44 | -0.09 |
| 8    | 0.88  | -0.42 | 1.55  | 1.02  |
| 9    | 1.38  | -1.33 | 1.27  | -1.18 |
| 10   | 0.82  | 1.77  | -0.67 | 1.85  |
| 11   | 0.85  | 0.53  | -0.89 | 1.86  |
| 12   | 1.43  | -0.45 | -1.36 | -0.25 |
| 13   | 1.06  | 0.21  | -0.65 | 1.84  |
| 14   | 1.13  | 1.03  | -1.52 | -0.75 |
| 15   | 1.08  | -0.04 | 1.73  | 0.45  |
| 16   | 1.09  | 1.48  | -1.37 | -0.94 |
| 17   | 1.48  | 0.67  | 1.11  | -1.31 |
| 18   | 1.43  | 1.72  | 1.99  | -0.92 |
| 19   | 1.12  | -1.24 | -0.06 | -0.66 |
| 20   | 1.34  | 1.76  | -0.79 | 1.50  |
